# Supplementary material for: Increased abundance of the adaptor protein containing pleckstrin homology domain, phosphotyrosine binding domain and leucine zipper motif (APPL1) in patients with obesity and type 2 diabetes: evidence for altered adiponectin signalling
Source: Springer Nature journal article supplement (doi:10.1007/s00125-011-2173-x), 2011-05-11
Supplement: MOESM2 [file 8090054]

## Electronic supplementary material

**ESM Table 1** Targeted peptides for  $\beta$ -actin and APPL1

| Peptide sequence     | Amino acid number |
|----------------------|-------------------|
| $\beta$ -Actin       |                   |
| AVFPSIVGRPR          | 29–39             |
| AGFAGDDAPR           | 19–28             |
| DSYVGDEAQS           | 51–61             |
| IWHHTFYNELR          | 85–95             |
| VAPEEHPVLLTEAPLNPK   | 96–113            |
| DLTDYLMK (oxidation) | 184–191           |
| SYELPDGQVITIGNER     | 239–254           |
| APPL1                |                   |
| VNQSALEAVTPSPSFQQR   | 390–407           |
| YEVTEDEVYTSR         | 161–171           |
| SSILQAESK            | 352–360           |
| QIYLSNPETAAR         | 376–389           |
| SETEDSILHQLFIVR      | 491–505           |
| LIDPQTQVTR           | 554–563           |
| IYDAQNELSAATHLTSK    | 47–63             |
