# Supplementary material for: Increased abundance of the adaptor protein containing pleckstrin homology domain, phosphotyrosine binding domain and leucine zipper motif (APPL1) in patients with obesity and type 2 diabetes: evidence for altered adiponectin signalling
Source: Springer Nature journal article supplement (doi:10.1007/s00125-011-2173-x), 2011-05-11
Supplement: MOESM3 [file 8090054]

## Electronic supplementary material

ESM Table 2 RT-PCR primers

| <b>Primer</b>          | <b>Sequence</b>                     |
|------------------------|-------------------------------------|
| <i>APPL1</i> forward   | 5'-TGT AAT TGG CTG TGT CCA TA-3'    |
| <i>APPL1</i> reverse   | 5'-GCT AAA TGC TTC CTC ATC AC-3'    |
| <i>ADIPOR1</i> forward | 5'-TTC TTC CTC ATG GCT GTG ATG T-3' |
| <i>ADIPOR1</i> reverse | 5'-AAG AAG CGC TCA GGA ATT CG-3'    |
| $\beta$ -Actin forward | 5'-AAA CTG GAA CGG TGA AGG TG-3'    |
| $\beta$ -Actin reverse | 5'-AGA GAA GTG GGG TGG CTT TT-3'    |
