# Supplementary material for: Increased abundance of the adaptor protein containing pleckstrin homology domain, phosphotyrosine binding domain and leucine zipper motif (APPL1) in patients with obesity and type 2 diabetes: evidence for altered adiponectin signalling
Source: Springer Nature journal article supplement (doi:10.1007/s00125-011-2173-x), 2011-05-11
Supplement: MOESM4 [file 8090054]

# Electronic supplementary material

## ESM Fig. 1

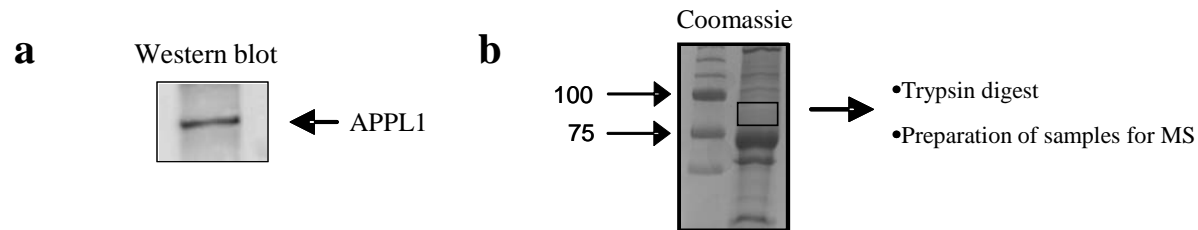

**c**

|     |                   |                   |                    |                    |                    |                   |                   |                   |
|-----|-------------------|-------------------|--------------------|--------------------|--------------------|-------------------|-------------------|-------------------|
| 1   | <i>MPGIDKLP</i>   | <i>IE</i>         | <i>ETLEDSPQ</i>    | <i>TR</i>          | <i>SLLGVFEEDA</i>  | <i>TAISNYMNQL</i> | <i>YQAMHRIYDA</i> | <i>QNELSAATHL</i> |
| 61  | <i>TSKLLKEYEK</i> | <i>QRFPLGGDDE</i> | <i>VMSSTLQQFS</i>  | <i>KVIDELSSCH</i>  | <i>AVLSTQLADA</i>  | <i>MMFPITQFKE</i> |                   |                   |
| 121 | <i>RDLKEILTLK</i> | <i>EVFQIASNDH</i> | <i>DAAINRYSRL</i>  | <i>SKKRENDKVK</i>  | <i>YEVTEDEVYTS</i> | <i>RKKQHQTMMH</i> |                   |                   |
| 181 | <i>YFCALNTLQY</i> | <i>KKKIALLEPL</i> | <i>LGYMQAQISF</i>  | <i>FKMGSENLENE</i> | <i>QLEEFANIG</i>   | <i>TSVQNVREM</i>  |                   |                   |
| 241 | <i>DSDIETMQQT</i> | <i>IEDLEVASDP</i> | <i>LYVPDPDPTK</i>  | <i>FPVNRNLTRK</i>  | <i>AGYLNARNKT</i>  | <i>GLVSSTWDRQ</i> |                   |                   |
| 301 | <i>FYFTQGGNLM</i> | <i>SQARGDVAGG</i> | <i>LAMDIDNCSV</i>  | <i>MAVDCEDRRY</i>  | <i>CFQITSFDGK</i>  | <i>KSSILQAESK</i> |                   |                   |
| 361 | <i>KDHEEWICTI</i> | <i>NNISKQIYLS</i> | <i>ENPEETAARV</i>  | <i>NQSALEAVTP</i>  | <i>SPSFQQRHES</i>  | <i>LRPAAGQSRP</i> |                   |                   |
| 421 | <i>PTARTSSSGS</i> | <i>LGSESTNLAA</i> | <i>LSLDSLVA PD</i> | <i>TPIQFDIISP</i>  | <i>VCEDQPGQAK</i>  | <i>AFGQGGRRTN</i> |                   |                   |
| 481 | <i>PFGESGGSTK</i> | <i>SETEDSILHQ</i> | <i>LFIVRFLGSM</i>  | <i>EVKSDDHPDV</i>  | <i>VYETMRQILA</i>  | <i>ARAIHNIFRM</i> |                   |                   |
| 541 | <i>TESHLLVTCD</i> | <i>CLKLIDPQTQ</i> | <i>VTRLTFPLPC</i>  | <i>VVLYATHQEN</i>  | <i>KRLFGFVLR</i>   | <i>SSGRSESNLS</i> |                   |                   |
| 601 | <i>SVCYIFESNN</i> | <i>EGEKICDSVG</i> | <i>LAKQIALHAE</i>  | <i>LDRRASEKQK</i>  | <i>EIERVKEKQQ</i>  | <i>KELNKQKQIE</i> |                   |                   |
| 661 | <i>KDLEEQSR</i>   | <i>LI</i>         | <i>AASSRPNQAS</i>  | <i>SEGQFVVLSS</i>  | <i>SQSEESDLGE</i>  | <i>GGKKRESEA</i>  |                   |                   |
