# Supplementary figures and images for: Increased abundance of the adaptor protein containing pleckstrin homology domain, phosphotyrosine binding domain and leucine zipper motif (APPL1) in patients with obesity and type 2 diabetes: evidence for altered adiponectin signalling
Source: PubMed Central journal article supplement — Diabetologia. 2011 May 12;54(8):2122–31. doi: 10.1007/s00125-011-2173-x (PMC3131511; doi:10.1007/s00125-011-2173-x), 2011-05-12

# Electronic supplementary material

## ESM Fig. 3

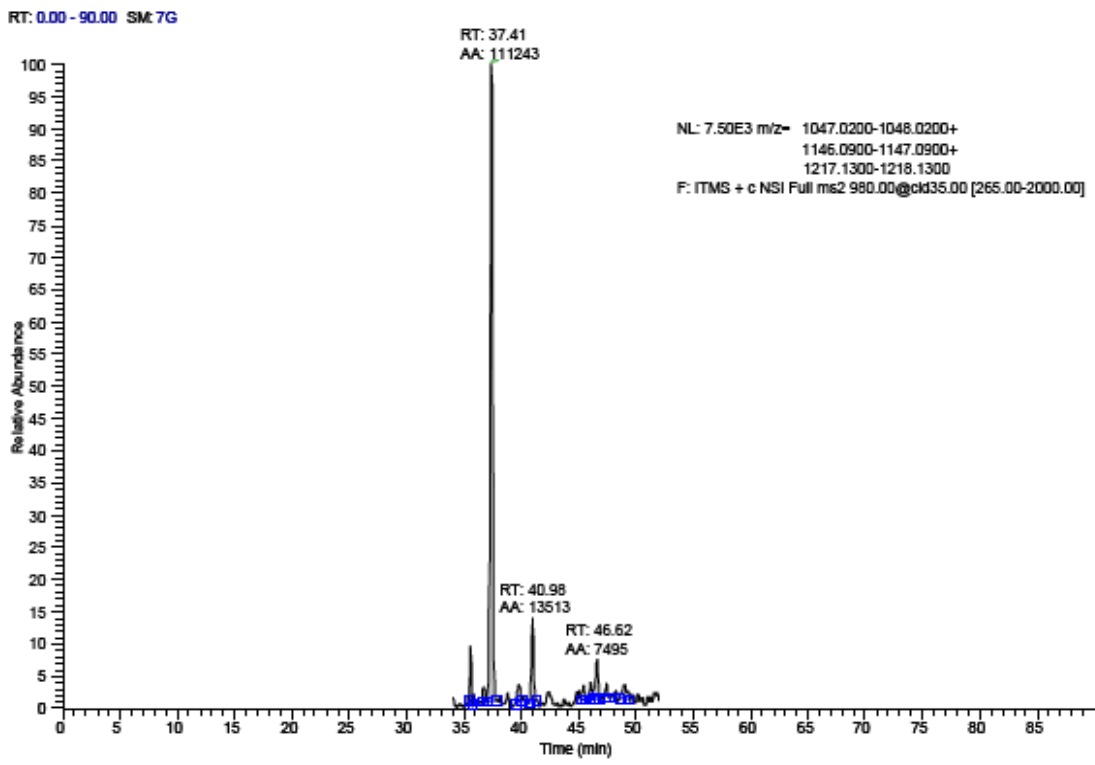

Supplement: 125_2011_2173_MOESM6_ESM.pdf [file 125_2011_2173_MOESM6_ESM.pdf]
