# Supplementary figures and images for: Increased abundance of the adaptor protein containing pleckstrin homology domain, phosphotyrosine binding domain and leucine zipper motif (APPL1) in patients with obesity and type 2 diabetes: evidence for altered adiponectin signalling
Source: Springer Nature journal article supplement (doi:10.1007/s00125-011-2173-x), 2011-05-11

# Electronic supplementary material

## ESM Fig. 2

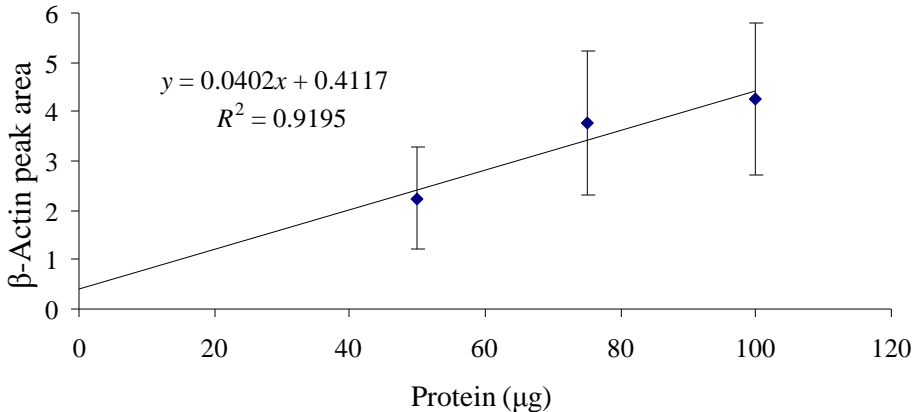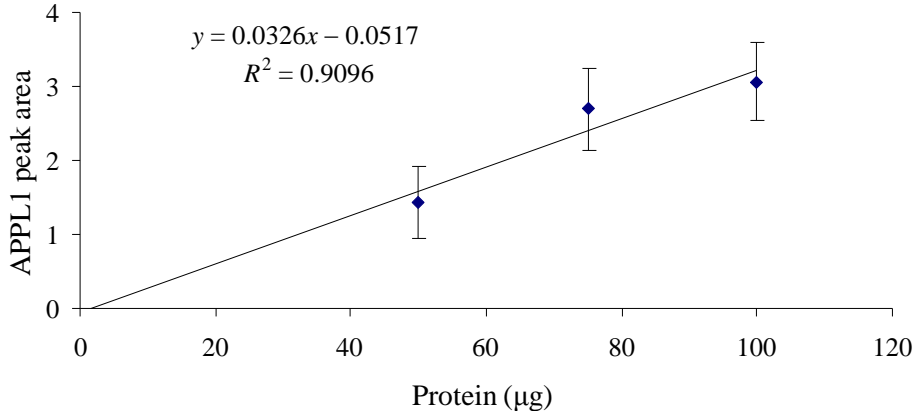

Supplement: MOESM5 [file 8090054]
